# Supplementary material
Source: publisher figshare collection journal article supplement (https://geolsoc.figshare.com/ndownloader/files/5423069)
Supplement: Supplementary file 1 [file 5423069]

	ISOTOPIC RATIOS							AGES Ma
Analysis	207Pb/235U	1s abs	206Pb/238U	1s abs	Rho	207Pb/206Pb	1s abs	207Pb/235U	1s abs	206Pb/238U	1s abs	207Pb/206Pb	1s abs	concordia	1s abs	MSWD	probab. conc.
#1	0.8090	0.1077	0.0979	0.0051	0.20	0.0600	0.0082	602	60	602	30	602	296	602	29	0.00	1.000
#2	0.8885	0.0838	0.0956	0.0031	0.17	0.0674	0.0057	646	45	589	18	850	176	593	18	5.96	0.015
#3	0.9043	0.1060	0.0959	0.0025	0.11	0.0684	0.0067	654	57	590	15	880	204	592	15	4.75	0.029
#4	0.8743	0.1108	0.0953	0.0031	0.13	0.0665	0.0092	638	60	587	18	822	289	589	18	2.71	0.100
#5	0.8855	0.1763	0.0967	0.0046	0.12	0.0664	0.0130	644	95	595	27	820	409	597	27	1.01	0.316
#6	0.8612	0.0742	0.0955	0.0027	0.17	0.0654	0.0056	631	41	588	16	787	181	592	16	4.17	0.041
#7	0.8261	0.0662	0.0970	0.0034	0.22	0.0618	0.0056	611	37	597	20	667	194	599	19	0.61	0.434
#8	0.8209	0.0866	0.0950	0.0041	0.20	0.0627	0.0063	609	48	585	24	697	216	588	23	0.89	0.345
#9	0.8129	0.0827	0.0934	0.0033	0.17	0.0632	0.0064	604	46	575	20	713	214	578	19	1.46	0.227
#10	0.7925	0.0779	0.0987	0.0044	0.23	0.0582	0.0060	593	44	607	26	539	226	604	24	0.38	0.535
#11	0.8050	0.0765	0.0945	0.0034	0.19	0.0618	0.0058	600	43	582	20	666	202	584	19	0.63	0.429
#12	0.8656	0.0715	0.0968	0.0033	0.21	0.0649	0.0051	633	39	595	19	771	166	600	19	3.52	0.061
#13	0.9259	0.0997	0.0966	0.0034	0.16	0.0695	0.0069	665	53	594	20	914	205	599	20	6.76	0.009
#14	1.0306	0.1746	0.0985	0.0048	0.14	0.0759	0.0103	719	87	605	28	1093	271	610	28	6.08	0.014
#15	0.8397	0.0767	0.0920	0.0028	0.17	0.0662	0.0062	619	42	567	17	814	194	571	16	5.65	0.017
#16	0.9221	0.1153	0.0958	0.0028	0.12	0.0698	0.0077	663	61	590	17	923	226	592	16	5.43	0.020
#17	0.8471	0.1160	0.0956	0.0039	0.15	0.0642	0.0096	623	64	589	23	750	316	591	23	1.10	0.295
#18	0.9634	0.1443	0.0944	0.0040	0.14	0.0740	0.0100	685	75	581	24	1042	272	586	24	6.96	0.008
#19	0.8965	0.0921	0.0994	0.0032	0.16	0.0654	0.0062	650	49	611	19	787	199	614	18	2.34	0.126
#20	0.9245	0.1254	0.0992	0.0043	0.16	0.0676	0.0077	665	66	610	25	857	238	614	25	2.60	0.107
#21	0.8229	0.0563	0.0956	0.0024	0.18	0.0624	0.0045	610	31	589	14	689	155	591	14	1.72	0.190
#22	0.8782	0.1542	0.0959	0.0037	0.11	0.0664	0.0119	640	83	590	22	820	373	592	22	1.35	0.245
#23	0.7283	0.0426	0.0857	0.0023	0.23	0.0616	0.0038	556	25	530	14	660	131	534	13	3.81	0.051
#24	0.8192	0.0668	0.0944	0.0032	0.21	0.0630	0.0050	608	37	581	19	707	169	585	18	1.88	0.170
#25	0.7785	0.0540	0.0944	0.0030	0.23	0.0598	0.0043	585	31	582	18	596	155	582	17	0.03	0.854
#26	0.8939	0.1043	0.0987	0.0049	0.21	0.0657	0.0071	648	56	607	29	797	227	612	27	2.08	0.149
#27	0.8631	0.0725	0.0943	0.0029	0.19	0.0664	0.0057	632	40	581	17	818	178	586	17	6.18	0.013
#28	0.8421	0.0821	0.0960	0.0040	0.21	0.0636	0.0063	620	45	591	24	729	208	595	23	1.59	0.207
#29	0.8341	0.0918	0.0941	0.0034	0.17	0.0643	0.0074	616	51	580	20	751	242	583	20	1.90	0.168
#30	0.8031	0.0653	0.0950	0.0031	0.20	0.0613	0.0051	599	37	585	18	649	179	587	17	0.49	0.483
#31	0.8505	0.0874	0.0963	0.0046	0.23	0.0641	0.0070	625	48	592	27	744	231	598	26	1.70	0.192
#32	0.9607	0.1077	0.0981	0.0040	0.18	0.0710	0.0074	684	56	603	23	958	212	610	23	7.59	0.006
#33	0.8708	0.0741	0.0953	0.0031	0.19	0.0663	0.0058	636	40	587	19	816	184	592	18	5.64	0.018
#34	0.7428	0.1056	0.0941	0.0043	0.16	0.0573	0.0079	564	62	580	25	502	304	578	24	0.25	0.616
#35	0.8215	0.0582	0.0921	0.0033	0.26	0.0647	0.0046	609	32	568	20	765	151	576	19	5.90	0.015
#36	0.8163	0.0824	0.0958	0.0031	0.16	0.0618	0.0054	606	46	590	18	668	186	591	18	0.49	0.486
#37	0.7827	0.0601	0.0939	0.0023	0.16	0.0605	0.0043	587	34	579	14	620	153	579	13	0.23	0.629
#38	1.4289	0.1781	0.1402	0.0042	0.12	0.0739	0.0087	901	74	846	24	1039	239	849	23	2.05	0.152
#39	1.1882	0.0823	0.1385	0.0048	0.25	0.0622	0.0048	795	38	836	27	681	163	824	24	4.11	0.043
#40	0.9132	0.1194	0.0971	0.0029	0.11	0.0682	0.0087	659	63	597	17	875	266	600	17	3.50	0.061
#41	0.9028	0.1185	0.0962	0.0038	0.15	0.0680	0.0066	653	63	592	23	869	201	596	22	3.45	0.063
#42	0.7151	0.0892	0.0972	0.0041	0.17	0.0533	0.0066	548	53	598	24	344	281	591	23	3.58	0.059
#43	0.7955	0.0676	0.0986	0.0040	0.24	0.0585	0.0055	594	38	606	23	549	205	604	22	0.36	0.547
#44	0.8767	0.0892	0.0960	0.0034	0.18	0.0663	0.0073	639	48	591	20	815	229	595	20	3.78	0.052
#45	3.2929	0.1285	0.2538	0.0067	0.34	0.0941	0.0033	1479	30	1458	35	1510	67	1471	27	1.30	0.255
#46	2.6879	0.1685	0.2277	0.0070	0.25	0.0856	0.0046	1325	46	1322	37	1330	103	1323	32	0.01	0.915
#47	0.8305	0.0858	0.0936	0.0034	0.17	0.0644	0.0067	614	48	577	20	754	221	580	19	2.32	0.128
#48	0.7874	0.0375	0.0944	0.0025	0.28	0.0605	0.0034	590	21	581	15	622	123	583	14	0.56	0.453
#49	0.8301	0.0614	0.0962	0.0030	0.21	0.0626	0.0043	614	34	592	18	695	146	595	17	1.54	0.214
#50	0.8315	0.0857	0.0963	0.0044	0.22	0.0626	0.0046	614	47	593	26	695	157	596	24	0.78	0.378
#51	0.8771	0.0633	0.0995	0.0031	0.22	0.0639	0.0047	639	34	611	18	740	155	616	17	2.51	0.113
#52	0.8207	0.0551	0.0974	0.0039	0.30	0.0611	0.0042	608	31	599	23	644	146	602	21	0.34	0.559
#53	1.0181	0.0669	0.1102	0.0040	0.27	0.0670	0.0049	713	34	674	23	837	153	683	21	4.78	0.029
#54	0.7219	0.1020	0.0952	0.0033	0.12	0.0550	0.0070	552	60	586	20	412	285	584	19	1.31	0.253
#55	0.9193	0.1283	0.0933	0.0040	0.15	0.0715	0.0095	662	68	575	24	971	271	580	23	6.02	0.014
#56	0.8694	0.1071	0.0949	0.0041	0.18	0.0664	0.0084	635	58	584	24	821	263	589	24	2.86	0.091
#57	0.7873	0.0674	0.0963	0.0025	0.15	0.0593	0.0051	590	38	593	15	577	189	593	14	0.03	0.868
#58	1.7301	0.2879	0.1630	0.0075	0.14	0.0770	0.0114	1020	107	973	42	1121	296	977	41	0.70	0.404
#59	0.7394	0.0664	0.0924	0.0034	0.20	0.0580	0.0050	562	39	570	20	530	191	569	19	0.16	0.689
#60	0.7661	0.0591	0.0957	0.0029	0.20	0.0581	0.0038	578	34	589	17	533	144	587	16	0.43	0.513
#61	0.8304	0.0629	0.0937	0.0029	0.21	0.0642	0.0050	614	35	578	17	750	165	582	17	4.02	0.045
#62	0.8224	0.0765	0.0940	0.0032	0.18	0.0634	0.0065	609	43	579	19	723	218	583	18	1.88	0.170
#63	0.9999	0.1728	0.0953	0.0046	0.14	0.0761	0.0129	704	88	587	27	1097	339	592	27	6.33	0.012
#64	0.9643	0.1501	0.0959	0.0045	0.15	0.0729	0.0116	686	78	590	27	1012	321	595	26	5.47	0.019
#65	0.9486	0.1211	0.0951	0.0034	0.14	0.0723	0.0105	677	63	586	20	995	296	590	20	7.69	0.006
#66	0.9687	0.1244	0.0969	0.0047	0.19	0.0725	0.0085	688	64	596	27	999	238	604	27	7.36	0.007
#67	0.8169	0.1076	0.0951	0.0045	0.18	0.0623	0.0091	606	60	585	27	685	312	588	26	0.46	0.497
#68	0.8286	0.0766	0.0951	0.0038	0.22	0.0632	0.0055	613	43	586	22	714	183	590	21	1.50	0.221
#69	0.7637	0.0895	0.0939	0.0042	0.19	0.0590	0.0071	576	52	579	25	566	263	578	24	0.01	0.919
#70	0.8814	0.1358	0.0937	0.0049	0.17	0.0682	0.0098	642	73	577	29	875	298	582	28	2.85	0.091
#71	0.8695	0.0852	0.0948	0.0045	0.24	0.0666	0.0081	635	46	584	27	824	254	592	25	4.59	0.032
#72	0.6845	0.1251	0.0952	0.0043	0.12	0.0522	0.0094	529	75	586	25	293	411	582	25	2.28	0.131
#73	0.9100	0.1154	0.0970	0.0036	0.14	0.0681	0.0079	657	61	597	21	871	240	600	21	3.63	0.057
#74	0.8714	0.0583	0.0969	0.0026	0.20	0.0652	0.0049	636	32	596	16	782	157	601	15	6.01	0.014
#75	0.9237	0.1322	0.0961	0.0048	0.17	0.0697	0.0097	664	70	592	28	920	286	597	27	4.00	0.045
#76	0.8776	0.1260	0.0956	0.0032	0.12	0.0666	0.0094	640	68	588	19	825	294	590	19	2.14	0.143
#77	0.7874	0.0956	0.0935	0.0037	0.16	0.0611	0.0073	590	54	576	22	641	258	578	21	0.23	0.631
